# Supplementary material for: Disruption of the S41 Peptidase Gene in Mycoplasma mycoides capri Impacts Proteome Profile, H2O2 Production, and Sensitivity to Heat Shock
Source: PLoS One. 2012 Dec 31;7(12):e51345. doi: 10.1371/journal.pone.0051345 (PMC3534093; doi:10.1371/journal.pone.0051345)
Supplement: Table S2 — Proteins that were significantly altered by the disruption of ctpA in M. mycoides subsp. capri GM12. The gene locus and gene name, if annotated, were identified using the Molligen database and the M. mycoides subsp. capri GM12, taxon:436113 genome sequence. GI accession numbers refer to GenBank (http://www.ncbi.nlm.nih.gov/genbank). The protein sequences are available at GenBank (http://www.ncbi.nlm.nih.gov/bioproject?term=PRJNA39245) and via Genomes on Line (http://www.genomesonline.org/cgi-bin/GOLD/index.cgi). Data is shown for three independent biological replicates. Protein ratios were generated by dividing the spectral intensity of a specific protein in the M. mycoides subsp. capri ctpA (clpP)::tetM mutant by the spectral intensity of the specific protein in M. mycoides subsp. capri GM12. Protein ratios were calculated with the Pro Group™ algorithm (Applied Biosystems/MDS SCIEX). Only ratios from the spectra that are distinct to each protein (or protein form) were used for the calculation. The total protein score is the measurement of all the peptide evidence for a protein and is analogous to protein scores reported by other protein identification software. Each identified peptide within a protein was assigned a score based on confidence (95% confidence = 2, 95% confidence = 1.3). Raw peptide identification was performed using the Paragon™ database searching algorithm (Applied Biosystems/MDS SCIEX). Raw peptide identification was further processed with the Pro Group Algorithm™ (Applied Biosystems/MDS SCIEX). Only proteins with 95% or greater confidence and an EF factor <2 were considered. Proteins were decreased in the mutant if the ratio was <1.0; proteins were increased in the mutant if the ratio was >1.0. Proteins were significantly different in the mutant if the P value was <0.001. Further, significance levels had to be obtained in all 3 biological replicates. (XLSX) [file pone.0051345.s004.xlsx]

## Sheet: Table S2 Altered information
Table S2. Proteins that were signficantly altered by the disruption of ctpA in M. mycoides capri GM12.
Gene Locus	GI Accession	Gene Name	Biological Process Group	Subgroup	Protein Name	Ratio 1	P Value	Ratio 2	P Value	Ratio 3	P Value
MMCAP2_0427	GI:256383898	pstB	Environment Information Processing	Membrane transport	Phosphate ABC transporter, ATP-binding protein	1.25434	0.00143365	1.36481	0.0087994	1.4597	0.000685445
MMCAP2_0336	GI:256383775	pts	Environmental Information Processing	Membrane transport	PTS system, IIA component	0.6015	9.73379e-07	0.609051	1.95469e-05	0.594108	2.25553e-07
MMCAP2_0360	GI:256384407	ffh	Environmental Information Processing	Membrane transport	Signal recognition particle protein (Fifty-four homolog)	1.50013	0.000895194	1.51734	2.04173e-05	1.44498	0.000715152
MMCAP2_0065	GI:256383836	trxA	Genetic Information Processing	Folding, Sorting and Degradation	Thioredoxin	0.653534	0.000132436	0.631034	2.48013e-07	0.635725	2.37378e-06
MMCAP2_0213	GI:256384154	eno	Genetic Information Processing	Folding, Sorting and Degradation	Phosphopyruvate hydratase	0.57659	6.66812e-06	0.62278	2.72757e-06	0.609703	4.55992e-08
MMCAP2_0545	GI:256384444	clpB	Genetic Information Processing	Folding, Sorting and Degradation	ATPase family associated with various cellular activities (AAA) protein	1.42771	4.59406e-05	1.34714	0.00203052	1.34254	0.000787878
MMCAP2_0771	GI:256384255	nrdE	Genetic Information Processing	Replication and Repair	Ribonucleoside diphosphate reductase, alpha subunit	0.69494	3.20985e-05	0.737846	0.00140327	0.699686	1.38494e-05
MMCAP2_0773	GI:256383837	nrdF	Genetic Information Processing	Replication and Repair	Ribonucleotide diphosphate reductase, beta subunit	0.656409	2.3934e-05	0.654051	1.45897e-07	0.617601	4.17522e-05
MMCAP2_0885	GI:256384192	gidA	Genetic Information Processing	Replication and repair	tRNA uridine 5-carboxymethylaminomethyl modification enzyme	1.44216	0.00748281	1.60453	0.000215093	1.61259	0.000599321
MMCAP2_0407	GI:256383860	rpoD	Genetic Information Processing	Transcription	RNA polymerase sigma-A factor	1.37807	0.000198433	1.44209	0.000453819	1.37245	0.000180778
MMCAP2_0025	GI:256384267	rpsR	Genetic Information Processing	Translation	30S ribosomal protein S18	1.39599	0.00120043	1.59645	2.7362e-06	1.50427	3.33964e-05
MMCAP2_0061	GI:256384387	serS	Genetic Information Processing	Translation	Serine-tRNA ligase	0.633098	0.00351997	0.572626	0.000179535	0.688062	0.00498871
MMCAP2_0148	GI:256383959	rpsL	Genetic Information Processing	Translation	30S ribosomal protein S12	1.40465	0.00498265	1.39009	0.000403769	1.37928	0.00382801
MMCAP2_0149	GI:256384325	rpsG	Genetic Information Processing	Translation	30S ribosomal protein S7	1.25718	7.80719e-07	1.42124	1.75109e-05	1.33269	4.16518e-06
MMCAP2_0151	GI:256384046	tuf	Genetic Information Processing	Translation	Translation elongation factor Tu	1.26693	2.61222e-10	1.26359	7.41526e-10	1.20885	3.35391e-11
MMCAP2_0222	GI:256384406	thrS	Genetic Information Processing	Translation	Threonine-tRNA ligase	0.575513	3.10116e-05	0.569328	5.68738e-05	0.614067	3.42165e-06
MMCAP2_0362	GI:256383751	rpsP	Genetic Information Processing	Translation	30S ribosomal protein S16	1.4887	0.00129889	1.41833	0.00428656	1.36505	0.00247205
MMCAP2_0519	GI:256383809	ileS	Genetic Information Processing	Translation	Isoleucyl-tRNA synthetase	0.703491	0.00483846	0.646307	0.0014812	0.62424	0.00194598
MMCAP2_0644	GI:256384429	rplQ	Genetic Information Processing	Translation	50S ribosomal protein L17	1.44683	0.000338841	1.42338	0.00139893	1.41008	2.16051e-05
MMCAP2_0653	GI:256383914	rplO	Genetic Information Processing	Translation	50S ribosomal protein L15	1.46363	4.47742e-06	1.48901	8.07864e-08	1.42378	3.46339e-05
MMCAP2_0656	GI:256384242	rplF	Genetic Information Processing	Translation	50S ribosomal protein L6	1.47859	2.918e-07	1.37733	3.93381e-08	1.39256	1.79466e-08
MMCAP2_0663	GI:256384037	rpmC	Genetic Information Processing	Translation	50S ribosomal protein L29	1.44473	5.83854e-05	1.45433	0.00180843	1.52312	5.03669e-05
MMCAP2_0667	GI:256383793	rpsS	Genetic Information Processing	Translation	30S ribosomal protein S19	1.39953	0.00419308	1.41102	0.000399989	1.37681	0.0036466
MMCAP2_0668	GI:256384129	rplB	Genetic Information Processing	Translation	50S ribosomal protein L2	1.2078	0.000265429	1.36628	4.44599e-06	1.33335	2.04305e-07
MMCAP2_0669	GI:256384414	rplW	Genetic Information Processing	Translation	50S ribosomal protein L23	1.35813	0.00032732	1.42312	0.00165379	1.34972	0.000268774
MMCAP2_0671	GI:256383913	rplC	Genetic Information Processing	Translation	50S ribosomal protein L3	1.33765	0.00100486	1.31864	0.000218045	1.26818	0.000728831
MMCAP2_0672	GI:256383948	rpsJ	Genetic Information Processing	Translation	30S ribosomal protein S10	1.54951	0.000465632	1.44976	0.000371984	1.40494	0.00355306
MMCAP2_0806	GI:256384064	rplL	Genetic Information Processing	Translation	50S ribosomal protein L7/L12	1.45281	8.88381e-14	1.37213	1.05938e-10	1.40039	6.94388e-12
MMCAP2_0809	GI:256384349	rplA	Genetic Information Processing	Translation	50S ribosomal protein L1	1.46114	3.55089e-05	1.43337	2.61743e-06	1.36173	0.000536848
MMCAP2_0810	GI:256384348	rplK	Genetic Information Processing	Translation	50S ribosomal protein L11	1.53016	0.000392737	1.49513	4.09241e-07	1.49163	4.6922e-06
MMCAP2_0036	GI:256384175	ldh	Metabolism	Amino acid	D-lactate dehydrogenase	0.599977	8.2433e-12	0.647139	5.25042e-15	0.583603	1.15337e-20
MMCAP2_0059	GI:256384082	ald	Metabolism	Amino acid	Alanine dehydrogenase	0.701136	8.81529e-06	0.657727	1.24914e-06	0.677441	2.04774e-12
MMCAP2_0120	GI:256384152	ilvA	Metabolism	Amino acid	Threonine ammonia lyase	0.639284	0.00401811	0.644573	8.7934e-05	0.634518	0.000556947
MMCAP2_0225	GI:256384125	pdhA	Metabolism	Amino acid	Pyruvate dehydrogenase (acetyl-transferring) E1 component, alpha subunit	0.771489	8.49731e-05	0.832802	0.00014256	0.820265	0.000179982
MMCAP2_0226	GI:256383970	pdhB	Metabolism	Amino acid	Pyruvate dehydrogenase E1 component, beta subunit	0.832526	0.00165677	0.8166	3.54361e-06	0.816266	1.29713e-06
MMCAP2_0519	GI:256383809	ileS	Metabolism	Amino acid	Isoleucyl-tRNA synthetase	0.703491	0.00483846	0.646307	0.0014812	0.62424	0.00194598
MMCAP2_0628	GI:256384178	arcB	Metabolism	Amino acid	Putrescine carbamoyltransferase	1.48044	2.27934e-06	1.56522	2.74982e-07	1.51611	2.03337e-05
MMCAP2_0765	GI:256383822	purB	Metabolism	Amino acid	Adenylosuccinate lyase	0.60515	0.00423104	0.542619	0.000189554	0.528558	0.0009151
MMCAP2_0766	GI:256383734	purA	Metabolism	Amino acid	Adenylosuccinate synthetase	0.417484	8.74581e-13	0.486928	7.91932e-12	0.443556	1.40762e-15
MMCAP2_0786	GI:256384178	arcB	Metabolism	Amino acid	Ornithine carbamoyltransferase	0.491801	1.29667e-08	0.547195	7.34834e-19	0.513991	2.34871e-19
MMCAP2_0059	GI:256384082	ald	Metabolism	Other Amino Acids	Alanine dehydrogenase	0.701136	8.81529e-06	0.657727	1.24914e-06	0.677441	2.04774e-12
MMCAP2_0036	GI:256384175	ldh	Metabolism	Carbohydrate	D-lactate dehydrogenase	0.599977	8.2433e-12	0.647139	5.25042e-15	0.583603	1.15337e-20
MMCAP2_0131	GI:256383897	fba	Metabolism	Carbohydrate	Fructose-1,6-bisphosphate aldolase, class II	0.739547	0.00458903	0.621542	1.08539e-07	0.63762	1.83516e-09
MMCAP2_0213	GI:256384154	eno	Metabolism	Carbohydrate	Phosphopyruvate hydratase	0.57659	6.66812e-06	0.62278	2.72757e-06	0.609703	4.55992e-08
MMCAP2_0225	GI:256384125	pdhA	Metabolism	Carbohydrate	Pyruvate dehydrogenase (acetyl-transferring) E1 component, alpha subunit	0.771489	8.49731e-05	0.832802	0.00014256	0.820265	0.000179982
MMCAP2_0226	GI:256383970	pdhB*	Metabolism	Carbohydrate	Pyruvate dehydrogenase E1 component, beta subunit	0.832526	0.00165677	0.8166	3.54361e-06	0.816266	1.29713e-06
MMCAP2_0336	GI:256383775	pts	Metabolism	Carbohydrate	PTS system, IIA component	0.6015	9.73379e-07	0.609051	1.95469e-05	0.594108	2.25553e-07
MMCAP2_0451	GI:256383657	gapN	Metabolism	Carbohydrate	NADP-dependent glyceraldehyde-3-phosphate dehydrogenase	0.558896	1.16186e-08	0.571332	2.76316e-07	0.548343	2.35369e-11
MMCAP2_0606	GI:256383985	pgk	Metabolism	Carbohydrate	Phosphoglycerate kinase	0.507297	1.45841e-13	0.501644	2.19622e-16	0.501722	3.49725e-18
MMCAP2_0607	GI:256383827	gap	Metabolism	Carbohydrate	glyceraldehyde-3-phosphate dehydrogenase, type I	0.768657	8.84329e-10	0.831291	2.13171e-08	0.788534	5.04245e-15
MMCAP2_0733	GI:256384239	manB	Metabolism	Carbohydrate	Phosphoglucomutase or phosphomannomutase	0.764965	0.00236074	0.687861	0.000351434	0.699964	0.000481263
MMCAP2_0831	GI:256384200	prs	Metabolism	Carbohydrate	Ribose phosphate pyrophosphokinase	0.694389	8.73832e-05	0.63446	3.87499e-06	0.639158	1.94172e-06
MMCAP2_0464	GI:256383892	lplA	Metabolism	Cofactors and Vitamins	Lipoate-protein ligase A	0.432829	3.88536e-21	0.463395	9.58718e-18	0.439998	2.0624e-24
MMCAP2_0344	GI:256384354	ppa	Metabolism	Energy	Inorganic diphosphatase	0.757811	7.36653e-05	0.763207	0.00109227	0.755202	0.00477323
MMCAP2_0188	GI:256384332	pepF	Metabolism	Enzyme Families	Oligoendopeptidase F	0.721534	9.92094e-06	0.783641	0.00683256	0.754273	1.99738e-05
MMCAP2_0129	GI:256383735	pyrG	Metabolism	Nucleotide	CTP synthase	0.573134	0.000186975	0.563932	4.18203e-05	0.515651	0.000239959
MMCAP2_0765	GI:256383822	purB	Metabolism	Nucleotide	Adenylosuccinate lyase	0.60515	0.00423104	0.542619	0.000189554	0.528558	0.0009151
MMCAP2_0766	GI:256383734	purA	Metabolism	Nucleotide	Adenylosuccinate synthetase	0.417484	8.74581e-13	0.486928	7.91932e-12	0.443556	1.40762e-15
MMCAP2_0771	GI:256384255	nrdE	Metabolism	Nucleotide	Ribonucleoside diphosphate reductase, alpha subunit	0.69494	3.20985e-05	0.737846	0.00140327	0.699686	1.38494e-05
MMCAP2_0773	GI:256383837	nrdF	Metabolism	Nucleotide	Ribonucleotide diphosphate reductase, beta subunit	0.656409	2.3934e-05	0.654051	1.45897e-07	0.617601	4.17522e-05
MMCAP2_0831	GI:256384200	prs	Metabolism	Nucleotide	Ribose phosphate pyrophosphokinase	0.694389	8.73832e-05	0.63446	3.87499e-06	0.639158	1.94172e-06
MMCAP2_0218	GI:256384014	glpK	Metabolism	Lipid Metabolism	Glycerol kinase	0.794722	0.00102449	0.77632	1.6442e-06	0.759832	5.12924e-07
MMCAP2_0077	GI:256384385		Unclassified	N/A	Putative hydrolase of the HAD family	0.698753	0.000917791	0.702738	0.000821612	0.740571	0.000176252
MMCAP2_0189	GI:256384403		Unclassified	N/A	Conserved hypothetical protein	0.677147	0.000415933	0.71982	8.30663e-06	0.653169	4.04745e-06
MMCAP2_0224	GI:256383771		Unclassified	N/A	Probable lipoate-protein ligase A	0.63341	0.000521942	0.704833	0.00164186	0.688578	0.00139442
MMCAP2_0237	GI:256384278		Unclassified	N/A	Dihydroxyacetone kinase, phosphotransfer subunit	2.06224	1.67231e-05	1.99629	1.05893e-06	2.07929	2.22327e-05
MMCAP2_0440	GI:256384251		Unclassified	N/A	Putative liporotein	0.859344	0.00381118	0.820043	0.000514521	0.801042	0.000784597
MMCAP2_0459	GI:256384114	gtsD	Unclassified	N/A	Glycerol ABC transporter, glycerol binding protein	0.411089	7.21824e-19	0.456366	2.89933e-24	0.449984	8.84958e-26
MMCAP2_0460	GI:256384225		Unclassified	N/A	Conserved hypothetical protein	0.807868	0.00011521	0.805332	0.0030869	0.8166	4.49582e-05
MMCAP2_0480	GI:256383953		Unclassified	N/A	Conserved hypothetical protein	0.758475	0.00155004	0.745799	0.000275105	0.704432	9.99138e-06
MMCAP2_0699	GI:256383915	msrA	Unclassified	N/A	Peptide methionine sulfoxide reductase msrA/msrB	0.367137	0.0006405	0.379926	4.68614e-05	0.372828	0.000554422
MMCAP2_0700	GI:256384024		Unclassified	N/A	Putative liporotein	0.622103	0.00267256	0.630926	4.71125e-05	0.677627	0.00102682
The gene locus and gene name, if annotated, were identified using the Molligen database and the M. mycoides subsp. capri GM12, taxon:436113 genome sequence. GI accession numbers refer to GenBank (www.ncbi.nlm.nih.gov/genbank). The protein sequences are available at GenBank (http://www.ncbi.nlm.nih.gov/bioproject?term=PRJNA39245) and via Genomes on Line (http://www.genomesonline.org/cgi-bin/GOLD/i…
.
